# Supplementary material
Source: PubMed Central journal article supplement (PMC6379073)
Supplement: NIHMS1004605-supplement-Supp.pdf [file NIHMS1004605-supplement-Supp.pdf]

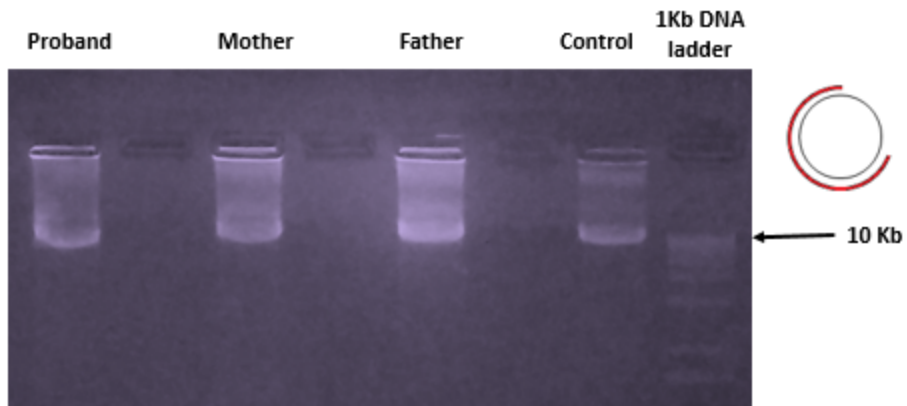

**Figure S1:** Long-range PCR amplification of the mitochondrial genome from blood was carried out between nucleotide positions 5,462–45 (20 ng total DNA per sample, 30 cycles of PCR; indicated by red line). No deletions in mtDNA was observed in the proband.

**Table S1.** List of 19 homozygous variants after the variant filtering. The variant in *MGME1* is highlighted in blue.

| <b>Gene</b>    | <b>cDNA Change</b>   | <b>OMIM Phenotype (of Gene)</b>                                     |
|----------------|----------------------|---------------------------------------------------------------------|
| <i>IRF2BPL</i> | c.368_369ins21       | None                                                                |
| <i>CACNA1H</i> | c.4566+5G>A          | Epilepsy, childhood absence, susceptibility to, 6                   |
| <i>TELO2</i>   | c.749G>A             | None                                                                |
| <i>GLYR1</i>   | c.967A>G             | None                                                                |
| <i>SARS2</i>   | c.364-7C>A           | Hyperuricemia, pulmonary hypertension, renal failure, and alkalosis |
| <i>RSAD2</i>   | c.346+1G>T           | None                                                                |
| <i>RSAD2</i>   | c.827T>G             | None                                                                |
| <i>PPP4R3B</i> | c.2518_2520del       | None                                                                |
| <i>ZNF638</i>  | c.1117T>G            | None                                                                |
| <i>DYSF</i>    | c.1799G>T            | Miyoshi muscular dystrophy 1                                        |
| <i>MGME1</i>   | c.359del             | Mitochondrial DNA depletion syndrome 11                             |
| <i>MYLK2</i>   | c.972+14G>A          | Cardiomyopathy, hypertrophic, 1, digenic                            |
| <i>ASXL1</i>   | c.320A>G             | Bohring-Opitz syndrome                                              |
| <i>SETD4</i>   | c.902-13_902-12insCT | None                                                                |
| <i>SETD4</i>   | c.902-17_902-16insGT | None                                                                |
| <i>C4ORF45</i> | c.234_237del         | None                                                                |
| <i>B4GALT1</i> | c.413-8C>A           | Congenital disorder of glycosylation, type IId                      |
| <i>SPAG8</i>   | c.1039G>A            | None                                                                |
| <i>AGTPBP1</i> | c.909+16_909+18del   | None                                                                |
